# Supplementary material for: Preparation of uniform Si nanoparticles for high-performance Li-ion battery anodes
Source: Royal Society of Chemistry journal article supplement (doi:10.1039/c5cp06585b), 2015-11-23
Supplement: c5cp06585b1.pdf [file c5cp06585b1.pdf]

# **Preparation of uniform silicon nanoparticles for high-performance Li-ion battery anodes**

Lin Sun, Tingting Su, Lei Xu, and Hong-Bin Du\*

*State Key Laboratory of Coordination Chemistry, Collaborative Innovation Center of Chemistry for Life Sciences,*

*School of Chemistry and Chemical Engineering, Nanjing University, Nanjing, 210093, China.*

*\*Corresponding Author: Tel: 86-25-89686581, E-mail address: [hbdu@nju.edu.cn](mailto:hbdu@nju.edu.cn) (H.-B.D.)*

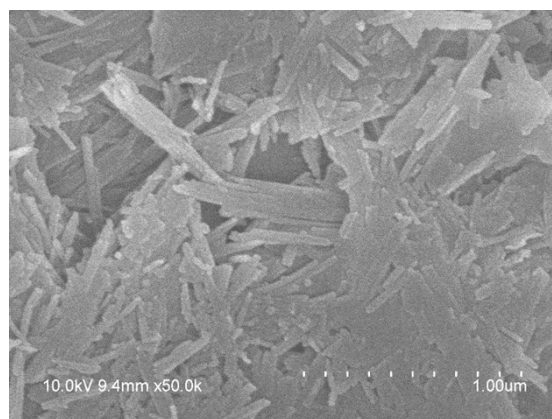

**Fig. S1.** SEM image of raw attapulgite.

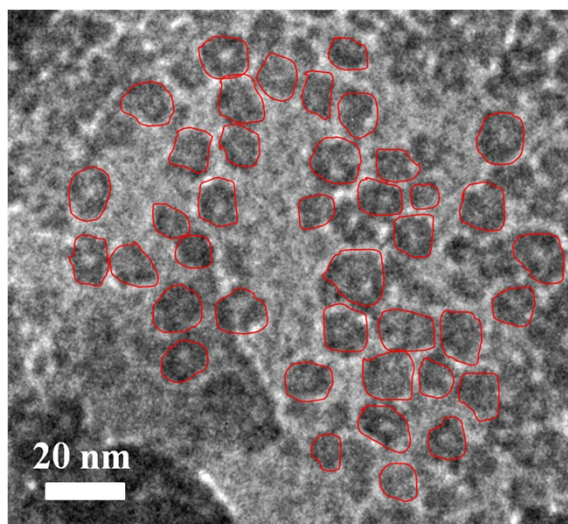

**Fig. S2** TEM image of bare Si NPs. Based on the marked 40 particles, the average size of Si NPs was determined as *ca.* 10.5 nm.

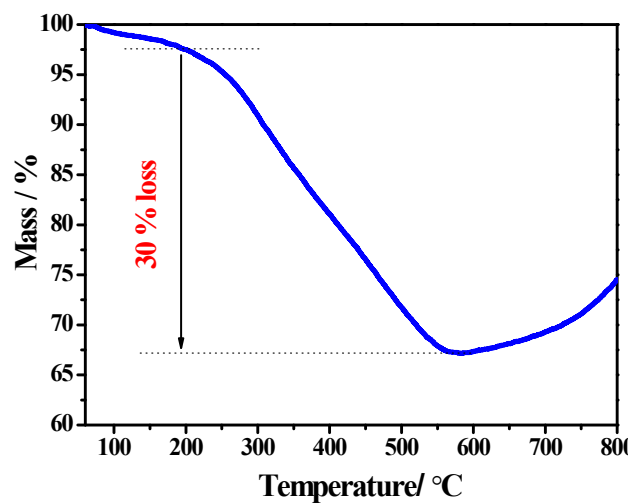

Fig. S3 TG curve of the ppy@Si nanocomposites.

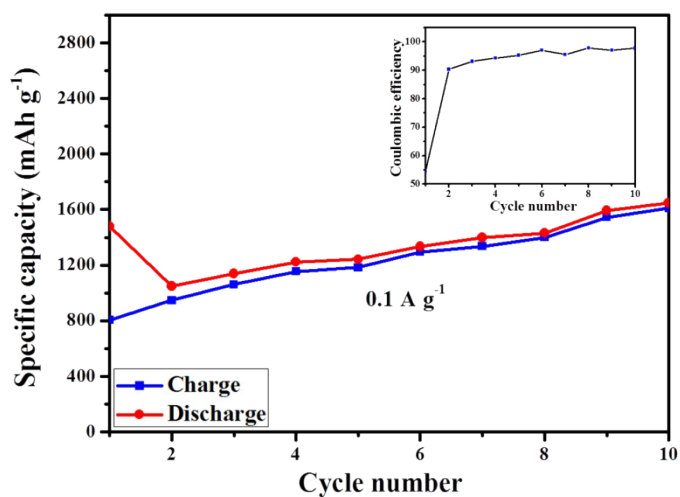

Fig. S4 First 10 charging-discharging cycles of ppy@Si nanocomposite at  $0.1 \text{ A g}^{-1}$  (Insert shows the corresponding coulombic efficiency)
